# Supplementary material for: Solvothermal synthesis and photocatalytic application of porous Au/TiO2 nanocomposites
Source: Royal Society of Chemistry journal article supplement (doi:10.1039/c2jm31759a), 2012-01-01
Supplement: c2jm31759a.pdf [file c2jm31759a.pdf]

## Supporting information:

# Solvothermal Synthesis and Photocatalytic Application of Porous Au/TiO<sub>2</sub> Nanocomposites

Xingdong Wang,<sup>a,b</sup> Timothy Dornom,<sup>a</sup> Mark Blackford,<sup>c</sup> and Rachel A. Caruso<sup>a,b,\*</sup>

<sup>a</sup> CSIRO Materials Science and Engineering, Private Bag 33, Clayton South, Vic. 3169, Australia;

<sup>b</sup>PFPC, School of Chemistry, The University of Melbourne, Melbourne, Vic. 3010, Australia;

<sup>c</sup> Australian Nuclear Science & Technology Organisation, PMB 1, Menai, NSW 2234, Australia

Corresponding author: E-mail: rcaruso@unimelb.edu.au

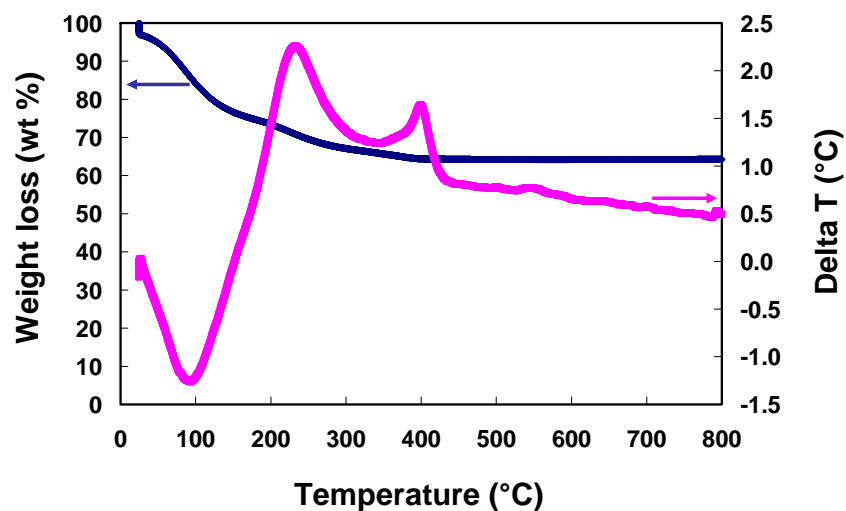

**Figure S1.** Typical TGA (left y axis) and SDTA (right y axis) curves of the porous agarose/TiO<sub>2</sub> hybrids.

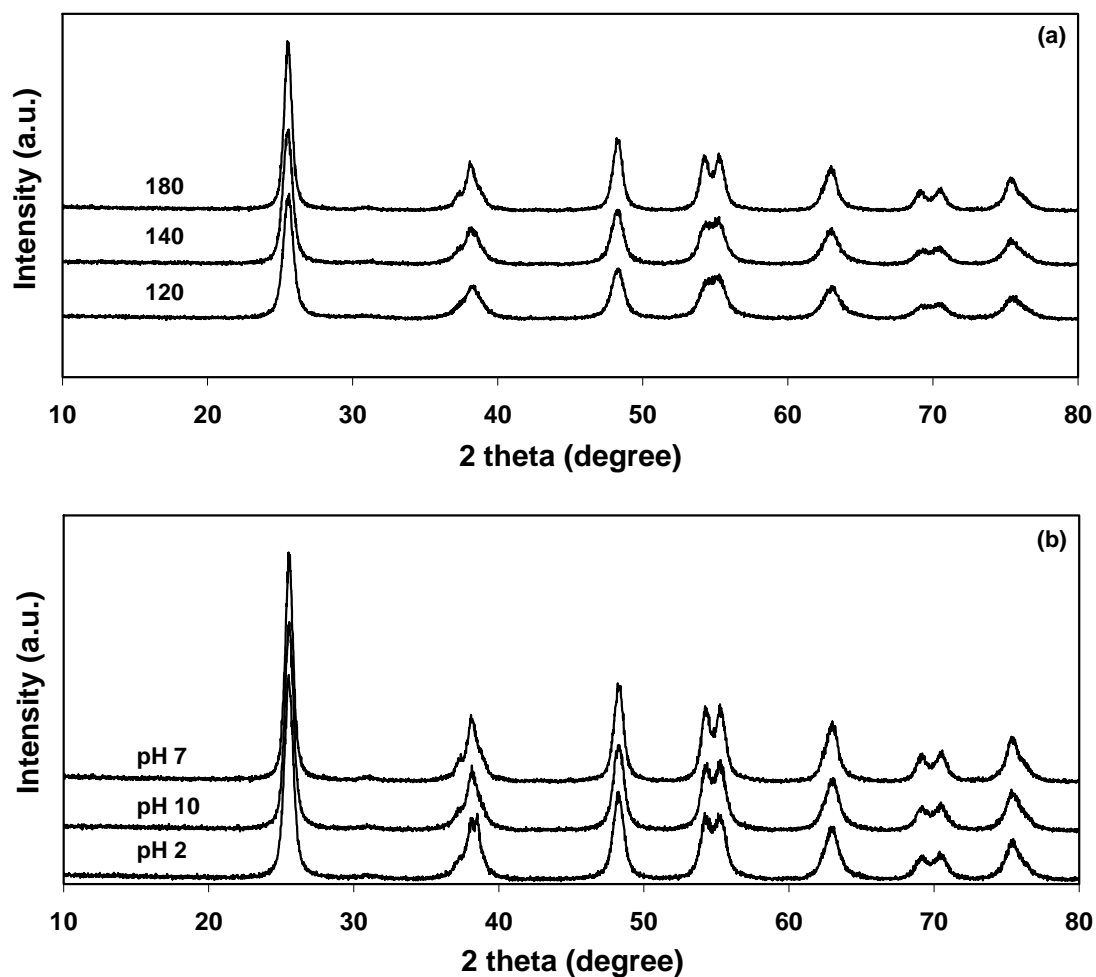

**Figure S2.** XRD patterns of Au/TiO<sub>2</sub> materials prepared at (a) pH 7 for 14 h at solvothermal temperatures of 120, 140 or 180 °C; and (b) 180 °C for 14 h after soaking in gold precursor solutions of pH 2, 7 or 10.

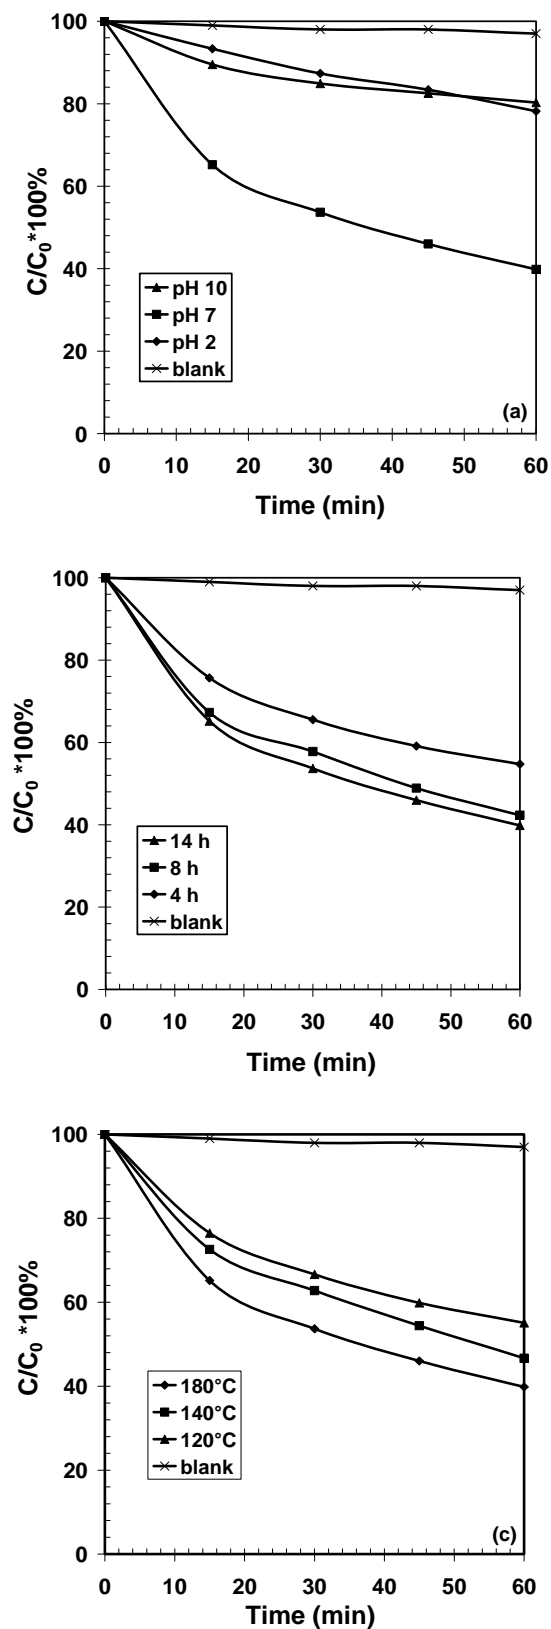

**Figure S3.** Effect of (a) gold precursor solution pH; solvothermal treatment (b) time, and (c) temperature on the photocatalytic activity of the Au/TiO<sub>2</sub> composites as a function of UV light irradiation time. Standard solvothermal treatment conditions: pH 7, 180 °C, 14 h, with variations as noted in each graph (gold concentration: 2.0 wt %). Blank indicates methylene blue degradation under UV light irradiation without a photocatalyst present.
